# Supplementary material for: A Population-Based Analysis of 30-Year Mortality among Five-Year Survivors of Adolescent and Young Adult Cancer: The Roles of Primary Cancer, Subsequent Malignancy, and Other Health Conditions
Source: MDPI journal article supplement (doi:10.3390/cancers13163956), 2021-08-05
Supplement: s1 [file s1]

**Table S1.** Multivariable analysis of patient and tumor factors for death by cause of death, 5-year survivors of AYA cancer diagnosed 1975–2012, SEER-9

|             |                                       | <i>n</i> | aHR [95%CI]       | <i>p</i> -value |
|-------------|---------------------------------------|----------|-------------------|-----------------|
|             | Cause of Death: All                   |          |                   |                 |
| Age (years) | 30–39                                 | 96,264   | Ref               | –               |
|             | 20–29                                 | 42,791   | 0.56 [0.54, 0.58] | <0.0001         |
|             | 15–19                                 | 8352     | 0.42 [0.39, 0.45] | <0.0001         |
| Sex         | Female                                | 94,242   | Ref               | –               |
|             | Male                                  | 53,165   | 1.05 [1.02, 1.08] | 0.0009          |
| Race        | White                                 | 124,481  | Ref               | –               |
|             | Black                                 | 12,188   | 1.68 [1.62, 1.75] | <0.0001         |
|             | Other <sup>1</sup>                    | 10,738   | 1.10 [1.04, 1.16] | 0.0006          |
| Stage       | Localized                             | 89,763   | Ref               | –               |
|             | Regional                              | 36,303   | 1.92 [1.86, 1.98] | <0.0001         |
|             | Distant                               | 11,064   | 2.61 [2.50, 2.73] | <0.0001         |
|             | Unstaged/unknown                      | 10,277   | 2.55 [2.45, 2.66] | <0.0001         |
|             | Cause of death: Primary cancer        |          |                   |                 |
| Age         | 30–39 years                           | 88,854   | Ref               | –               |
|             | 20–29 years                           | 40,190   | 0.50 [0.48, 0.53] | <0.0001         |
|             | 15–19 years                           | 7895     | 0.37 [0.33, 0.40] | <0.0001         |
| Sex         | Female                                | 88,387   | Ref               | –               |
|             | Male                                  | 48,552   | 0.80 [0.77, 0.84] | <0.0001         |
| Race        | White                                 | 115,941  | Ref               | –               |
|             | Black                                 | 10,893   | 1.57 [1.48, 1.66] | <0.0001         |
|             | Other <sup>1</sup>                    | 10,105   | 1.02 [0.95, 1.10] | 0.59            |
| Stage       | Localized                             | 84,286   | Ref               | –               |
|             | Regional                              | 33,931   | 2.64 [2.53, 2.75] | <0.0001         |
|             | Distant                               | 10,159   | 3.63 [3.42, 3.85] | <0.0001         |
|             | Unstaged/unknown                      | 8563     | 3.60 [3.40, 3.81] | <0.0001         |
|             | Cause of death: Subsequent malignancy |          |                   |                 |
| Age         | 30–39 years                           | 82,119   | Ref               | –               |
|             | 20–29 years                           | 38,531   | 0.53 [0.49, 0.58] | <0.0001         |
|             | 15–19 years                           | 7618     | 0.41 [0.34, 0.49] | <0.0001         |
| Sex         | Female                                | 82,165   | Ref               | –               |
|             | Male                                  | 46,103   | 1.10 [1.02, 1.19] | 0.009           |
| Race        | White                                 | 108,982  | Ref               | –               |
|             | Black                                 | 9770     | 1.51 [1.34, 1.71] | <0.0001         |
|             | Other <sup>1</sup>                    | 9516     | 1.17 [1.01, 1.36] | 0.031           |
| Stage       | Localized                             | 81,542   | Ref               | –               |
|             | Regional                              | 30,444   | 1.33 [1.22, 1.46] | <0.0001         |
|             | Distant                               | 8929     | 1.63 [1.41, 1.88] | <0.0001         |
|             | Unstaged/unknown                      | 7353     | 2.13 [1.92, 2.36] | <0.0001         |
|             | Cause of death: Non-malignant causes  |          |                   |                 |
| Age         | 30–39 years                           | 84,945   | Ref               | –               |
|             | 20–29 years                           | 39,694   | 0.61 [0.58, 0.65] | <0.0001         |
|             | 15–19 years                           | 7825     | 0.46 [0.42, 0.52] | <0.0001         |
| Sex         | Female                                | 84,084   | Ref               | –               |
|             | Male                                  | 48,380   | 1.62 [1.54, 1.70] | <0.0001         |
| Race        | White                                 | 112,242  | Ref               | –               |
|             | Black                                 | 10,467   | 2.22 [2.07, 2.37] | <0.0001         |

|       |                    |        |                   |         |
|-------|--------------------|--------|-------------------|---------|
|       | Other <sup>1</sup> | 9755   | 1.19 [1.08, 1.32] | 0.0004  |
| Stage | Localized          | 83,579 | Ref               | –       |
|       | Regional           | 31,402 | 1.38 [1.30, 1.46] | <0.0001 |
|       | Distant            | 9404   | 2.04 [1.88, 2.22] | <0.0001 |
|       | Unstaged/unknown   | 8079   | 2.23 [2.09, 2.38] | <0.0001 |

<sup>1</sup> Other race = Asian/Pacific Islander/American Indian/Alaska Native. AYA = adolescent and young adult. aHR = adjusted hazard ratio; 95%CI = 95% confidence interval; Ref = reference group.

**Table S2.** Attributable mortality by cause of death, 5-year survivors of AYA cancer diagnosed 1975–2012, SEER-9

**A. Death from all causes**

| Primary cancer site      | All causes of death | Primary cancer | Subsequent malignancy | Non-malignant causes |
|--------------------------|---------------------|----------------|-----------------------|----------------------|
| All Cancers              | 25,658              | 14,052 (54.8)  | 3228 (12.6)           | 8378 (32.6)          |
| Breast, female           | 6343                | 4843 (76.4)    | 583 (9.2)             | 917 (14.4)           |
| Melanoma                 | 2121                | 1272 (60.0)    | 296 (14.0)            | 553 (26.1)           |
| Bone/soft tissue sarcoma | 1239                | 704 (56.8)     | 162 (13.1)            | 373 (30.1)           |
| Non-Hodgkin lymphoma     | 1448                | 698 (48.2)     | 148 (10.2)            | 602 (41.6)           |
| Hodgkin lymphoma         | 2574                | 918 (35.7)     | 450 (17.5)            | 1206 (46.8)          |
| Cervical/uterine         | 1767                | 512 (29.0)     | 332 (18.8)            | 923 (52.2)           |
| Testicular germ cell     | 1372                | 261 (19.0)     | 310 (22.6)            | 801 (58.4)           |
| Thyroid                  | 941                 | 162 (17.2)     | 265 (28.2)            | 514 (54.6)           |
| Other                    | 7853                | 4682 (59.6)    | 682 (8.7)             | 2489 (31.7)          |

**B. Death by subsequent malignancy**

| Primary cancer site      | All subsequent malignancies | Lung and bronchus | Colon and rectum | Liver and intrahepatic bile duct | Pancreas  | Breast     | Bone, joint, and soft tissue | Ovary      | Kidney and bladder | Brain and CNS | Non-Hodgkin lymphoma | Acute myeloid leukemia | Other      |
|--------------------------|-----------------------------|-------------------|------------------|----------------------------------|-----------|------------|------------------------------|------------|--------------------|---------------|----------------------|------------------------|------------|
| All Cancers              | 3228                        | 828 (25.6)        | 250 (7.7)        | 120 (3.7)                        | 249 (7.7) | 331 (10.2) | 139 (4.3)                    | 194 (6.1)  | 140 (4.3)          | 136 (4.2)     | 85 (2.6)             | 86 (2.7)               | 670 (20.8) |
| Breast, female           | 583                         | 135 (23.2)        | 32 (5.5)         | 14 (2.4)                         | 44 (7.5)  | 0 (0.0)    | 17 (2.9)                     | 146 (25.0) | 15 (2.6)           | 21 (3.6)      | 18 (3.1)             | 21 (3.6)               | 120 (20.6) |
| Melanoma                 | 296                         | 78 (26.4)         | 22 (7.4)         | 9 (3.0)                          | 17 (5.7)  | 39 (13.2)  | 8 (2.7)                      | 10 (3.4)   | 11 (3.7)           | 21 (7.1)      | 13 (4.4)             | 10 (3.4)               | 58 (19.6)  |
| Bone/soft tissue sarcoma | 162                         | 35 (21.6)         | 10 (6.2)         | 7 (4.3)                          | 4 (2.5)   | 25 (15.4)  | 25 (15.4)                    | 4 (2.5)    | 3 (1.8)            | 6 (3.7)       | 3 (1.8)              | 6 (3.7)                | 34 (21.0)  |
| Non-Hodgkin lymphoma     | 148                         | 43 (29.0)         | 9 (6.1)          | 15 (10.1)                        | 11 (7.4)  | 16 (10.8)  | 7 (4.7)                      | 2 (1.4)    | 9 (6.1)            | 1 (0.7)       | 0 (0.0)              | 0 (0.0)                | 35 (23.6)  |
| Hodgkin lymphoma         | 450                         | 157 (34.9)        | 32 (7.1)         | 9 (2.0)                          | 27 (6.0)  | 77 (17.1)  | 27 (6.0)                     | 6 (1.3)    | 8 (1.8)            | 18 (4.0)      | 0 (0.0)              | 0 (0.0)                | 89 (19.8)  |
| Cervical/uterine         | 332                         | 91 (27.4)         | 50 (15.1)        | 8 (2.4)                          | 21 (6.3)  | 50 (15.1)  | 15 (4.5)                     | 0 (0.0)    | 19 (5.7)           | 6 (1.8)       | 9 (2.7)              | 5 (1.5)                | 58 (17.5)  |
| Testicular germ cell     | 310                         | 62 (20.0)         | 31 (10.0)        | 19 (6.1)                         | 56 (18.1) | 0 (0.0)    | 6 (1.9)                      | 9 (2.9)    | 36 (11.6)          | 6 (1.9)       | 8 (2.6)              | 16 (5.2)               | 61 (19.7)  |
| Thyroid                  | 265                         | 56 (21.1)         | 14 (5.3)         | 9 (3.4)                          | 11 (4.2)  | 55 (20.8)  | 7 (2.6)                      | 15 (5.7)   | 12 (4.5)           | 18 (6.8)      | 12 (4.5)             | 6 (2.3)                | 50 (18.9)  |
| Other                    | 682                         | 171 (25.1)        | 50 (7.3)         | 30 (4.4)                         | 58 (8.5)  | 69 (10.1)  | 27 (4.0)                     | 11 (1.6)   | 27 (4.0)           | 39 (5.7)      | 22 (3.2)             | 22 (3.2)               | 156 (22.9) |

C. Death by non-malignant causes

| Primary cancer site      | All non-malignant causes | Cardio/cerebrovascular disease | Infection  | Pulmonary disease | Renal disease | External causes | Other       |
|--------------------------|--------------------------|--------------------------------|------------|-------------------|---------------|-----------------|-------------|
| All Cancers              | 8378                     | 2928 (34.9)                    | 986 (11.8) | 379 (4.5)         | 196 (2.3)     | 1260 (15.0)     | 2629 (31.4) |
| Breast, female           | 917                      | 366 (39.9)                     | 75 (8.2)   | 49 (5.3)          | 15 (1.6)      | 97 (10.6)       | 315 (34.4)  |
| Melanoma                 | 553                      | 169 (30.6)                     | 57 (10.3)  | 15 (2.7)          | 5 (0.9)       | 126 (22.8)      | 181 (32.7)  |
| Bone/soft tissue sarcoma | 373                      | 132 (35.4)                     | 36 (9.6)   | 14 (3.8)          | 4 (1.1)       | 74 (19.8)       | 113 (30.3)  |
| Non-Hodgkin lymphoma     | 602                      | 157 (26.1)                     | 180 (29.9) | 19 (3.2)          | 13 (2.2)      | 81 (13.4)       | 152 (25.2)  |
| Hodgkin lymphoma         | 1206                     | 557 (46.2)                     | 159 (13.2) | 38 (3.2)          | 21 (1.7)      | 139 (11.5)      | 292 (24.2)  |
| Cervical/uterine         | 923                      | 307 (33.3)                     | 80 (8.7)   | 67 (7.2)          | 33 (3.6)      | 101 (10.9)      | 335 (36.3)  |
| Testicular germ cell     | 801                      | 265 (33.1)                     | 93 (11.6)  | 18 (2.2)          | 15 (1.9)      | 179 (22.3)      | 231 (28.8)  |
| Thyroid                  | 514                      | 166 (32.3)                     | 37 (7.2)   | 26 (5.0)          | 18 (3.5)      | 86 (16.7)       | 181 (35.2)  |
| Other                    | 2489                     | 809 (32.5)                     | 269 (10.8) | 133 (5.3)         | 72 (2.9)      | 377 (15.1)      | 829 (33.3)  |

AYA = adolescent and young adult.

**Table S3.** Observed numbers and standardized mortality ratios by cause of death and age group at diagnosis, 5-year survivors of all AYA cancers diagnosed 1975–2012, SEER-9

| Cause of death                        | 15–19 years |                             | 20–24 years |                            | 25–29 years |                          | 30–34 years |                          | 35–39 years |                           |
|---------------------------------------|-------------|-----------------------------|-------------|----------------------------|-------------|--------------------------|-------------|--------------------------|-------------|---------------------------|
|                                       | Obs         | SMR [95%CI]                 | Obs         | SMR [95%CI]                | Obs         | SMR [95%CI]              | Obs         | SMR [95%CI]              | Obs         | SMR [95%CI]               |
| All causes of death                   | 1146        | <b>4.59 [4.33, 4.86]</b>    | 2144        | <b>3.71 [3.56, 3.87]</b>   | 4027        | <b>3.18 [3.08, 3.28]</b> | 6898        | <b>2.87 [2.80, 2.94]</b> | 11,784      | <b>2.70 [2.65, 2.75]</b>  |
| Malignant cancers <sup>1</sup>        | 704         | <b>16.94 [15.71, 18.24]</b> | 1269        | <b>10.09 [9.54, 10.66]</b> | 2570        | <b>7.50 [7.21, 7.80]</b> | 4698        | <b>6.29 [6.11, 6.48]</b> | 8039        | <b>5.49 [5.37, 5.61]</b>  |
| Cardio/cerebrovascular                | 126         | <b>3.30 [2.75, 3.93]</b>    | 270         | <b>2.45 [2.17, 2.77]</b>   | 457         | <b>1.65 [1.50, 1.81]</b> | 715         | <b>1.23 [1.15, 1.33]</b> | 1360        | <b>1.22 [1.15, 1.28]</b>  |
| Infections                            | 56          | <b>3.32 [2.51, 4.31]</b>    | 99          | <b>2.36 [1.91, 2.87]</b>   | 194         | <b>2.31 [2.00, 2.66]</b> | 271         | <b>1.96 [1.74, 2.21]</b> | 366         | <b>1.67 [1.50, 1.85]</b>  |
| Pulmonary                             | 10          | <b>2.96 [1.42, 5.44]</b>    | 16          | 1.42 [0.81, 2.30]          | 46          | 1.31 [0.96, 1.74]        | 92          | 1.03 [0.83, 1.26]        | 215         | 1.06 [0.93, 1.21]         |
| Renal                                 | 10          | <b>5.51 [2.64, 10.13]</b>   | 14          | <b>2.80 [1.53, 4.70]</b>   | 33          | <b>2.55 [1.76, 3.58]</b> | 43          | <b>1.51 [1.09, 2.04]</b> | 96          | <b>1.66 [1.35, 2.03]</b>  |
| Liver and cirrhosis                   | 11          | 1.50 [0.75, 2.69]           | 27          | 1.27 [0.84, 1.85]          | 47          | 0.98 [0.72, 1.30]        | 81          | 0.96 [0.76, 1.19]        | 111         | <b>0.83 [0.69, 1.00]</b>  |
| Complications of pregnancy/childbirth | 1           | 1.58 [0.04, 8.82]           | 3           | 3.15 [0.65, 9.20]          | 2           | 1.58 [0.19, 5.70]        | 5           | <b>4.03 [1.31, 9.39]</b> | 5           | <b>4.91 [1.59, 11.46]</b> |
| Suicide and self-inflicted Injury     | 29          | 1.21 [0.81, 1.74]           | 55          | 1.30 [0.98, 1.69]          | 65          | 0.98 [0.75, 1.24]        | 100         | 1.14 [0.93, 1.38]        | 131         | <b>1.20 [1.00, 1.42]</b>  |
| Accidents and adverse events          | 60          | 1.00 [0.76, 1.29]           | 123         | <b>1.23 [1.02, 1.47]</b>   | 149         | 0.97 [0.82, 1.14]        | 196         | 0.96 [0.83, 1.10]        | 272         | 1.03 [0.91, 1.16]         |
| Homicide and legal intervention       | 9           | 0.65 [0.30, 1.24]           | 12          | 0.65 [0.33, 1.13]          | 18          | 0.75 [0.45, 1.19]        | 15          | 0.56 [0.31, 0.92]        | 26          | 0.88 [0.57, 1.29]         |
| All other causes                      | 95          | <b>2.30 [1.86, 2.81]</b>    | 218         | <b>2.23 [1.94, 2.54]</b>   | 364         | <b>1.68 [1.51, 1.86]</b> | 607         | <b>1.48 [1.37, 1.61]</b> | 1052        | <b>1.42 [1.34, 1.51]</b>  |

<sup>1</sup> Includes primary cancer and subsequent malignancy. AYA = adolescent and young adult. SMR = standardized mortality ratio; Obs = observed number of deaths. 95%CI = 95% confidence interval.

**Table S4.** Observed cases and standardized mortality ratios by cause of death and race, 5-year survivors of all AYA cancers diagnosed 1975–2012, SEER-9

| Cause of death                        | White  |                          | Black |                          | Other** |                             |
|---------------------------------------|--------|--------------------------|-------|--------------------------|---------|-----------------------------|
|                                       | Obs    | SMR [95%CI]              | Obs   | SMR [95%CI]              | Obs     | SMR [95%CI]                 |
| All causes of death                   | 21,190 | <b>2.79 [2.75, 2.83]</b> | 3089  | <b>3.18 [3.07, 3.29]</b> | 1720    | <b>5.92 [5.65, 6.21]</b>    |
| Malignant cancers <sup>1</sup>        | 14,179 | <b>5.98 [5.89, 6.08]</b> | 1909  | <b>7.57 [7.23, 7.92]</b> | 1192    | <b>12.12 [11.44, 12.83]</b> |
| Cardio/cerebrovascular                | 2298   | <b>1.30 [1.25, 1.35]</b> | 448   | <b>1.57 [1.43, 1.72]</b> | 182     | <b>2.73 [2.34, 3.15]</b>    |
| Infections                            | 725    | <b>1.85 [1.72, 1.99]</b> | 191   | <b>2.05 [1.77, 2.36]</b> | 70      | <b>4.61 [3.59, 5.83]</b>    |
| Pulmonary                             | 329    | 1.05 [0.94, 1.17]        | 35    | <b>1.54 [1.07, 2.14]</b> | 15      | <b>2.76 [1.55, 4.55]</b>    |
| Renal                                 | 135    | <b>1.69 [1.42, 2.00]</b> | 46    | <b>2.09 [1.53, 2.79]</b> | 15      | <b>3.62 [2.03, 5.98]</b>    |
| Liver and cirrhosis                   | 235    | 0.90 [0.78, 1.02]        | 28    | 1.45 [0.96, 2.09]        | 14      | 1.13 [0.62, 1.90]           |
| Complications of pregnancy/childbirth | 9      | <b>2.51 [1.15, 4.77]</b> | 5     | <b>4.22 [1.37, 9.85]</b> | 2       | 5.83 [0.71, 21.08]          |
| Suicide and self-inflicted Injury     | 362    | <b>1.16 [1.04, 1.29]</b> | 9     | 1.03 [0.47, 1.96]        | 9       | 0.95 [0.44, 1.81]           |
| Accidents and adverse events          | 663    | 0.94 [0.87, 1.02]        | 79    | <b>1.40 [1.11, 1.75]</b> | 58      | <b>2.31 [1.76, 2.99]</b>    |
| Homicide and legal intervention       | 55     | <b>0.69 [0.52, 0.90]</b> | 19    | 0.67 [0.40, 1.05]        | 6       | 1.22 [0.45, 2.66]           |
| All other causes                      | 1901   | <b>1.49 [1.42, 1.56]</b> | 293   | <b>1.63 [1.45, 1.83]</b> | 142     | <b>3.02 [2.54, 3.56]</b>    |

<sup>1</sup> Includes primary cancer and subsequent malignancy. \*\*Other race = Asian/Pacific Islander/American Indian/Alaska Native. AYA = adolescent and young adult. SMR = standardized mortality ratio; Obs = observed number of deaths. 95%CI = 95% confidence interval.

**Table S5.** Observed numbers and standardized mortality ratios by cause of death and latency from diagnosis through 30 years, 5-year survivors of all AYA cancers diagnosed 1975–2012, SEER-9

| Cause of death                        | 5–10 years from diagnosis |                             | 10–20 years from diagnosis |                          | 20–30 years from diagnosis |                          |
|---------------------------------------|---------------------------|-----------------------------|----------------------------|--------------------------|----------------------------|--------------------------|
|                                       | Obs                       | SMR [95%CI]                 | Obs                        | SMR [95%CI]              | Obs                        | SMR [95%CI]              |
| All causes of death                   | 9564                      | <b>7.41 [7.26, 7.56]</b>    | 8448                       | <b>2.88 [2.82, 2.94]</b> | 5413                       | <b>1.84 [1.80, 1.89]</b> |
| Malignant cancers <sup>1</sup>        | 7798                      | <b>27.53 [26.92, 28.14]</b> | 5489                       | <b>6.45 [6.28, 6.62]</b> | 2852                       | <b>2.83 [2.72, 2.93]</b> |
| Cardiovascular/cerebrovascular        | 378                       | <b>1.59 [1.43, 1.75]</b>    | 947                        | <b>1.40 [1.31, 1.49]</b> | 1023                       | <b>1.36 [1.27, 1.44]</b> |
| Infections                            | 313                       | <b>3.09 [2.75, 3.45]</b>    | 347                        | <b>1.88 [1.69, 2.09]</b> | 217                        | <b>1.56 [1.36, 1.78]</b> |
| Pulmonary                             | 18                        | 1.16 [0.69, 1.84]           | 86                         | <b>1.25 [1.00, 1.54]</b> | 155                        | 1.14 [0.97, 1.33]        |
| Renal                                 | 18                        | <b>1.92 [1.14, 3.03]</b>    | 60                         | <b>2.18 [1.67, 2.81]</b> | 77                         | <b>1.95 [1.54, 2.43]</b> |
| Liver and cirrhosis                   | 59                        | 1.24 [0.95, 1.60]           | 104                        | 0.89 [0.73, 1.08]        | 78                         | 0.83 [0.65, 1.03]        |
| Complications of pregnancy/childbirth | 8                         | <b>3.31 [1.43, 6.53]</b>    | 8                          | <b>3.68 [1.59, 7.25]</b> | 0                          | 0.00 [0.00, 7.89]        |
| Suicide and self-inflicted Injury     | 120                       | <b>1.24 [1.03, 1.49]</b>    | 157                        | 1.12 [0.95, 1.31]        | 76                         | 1.05 [0.83, 1.32]        |
| Accidents and adverse events          | 237                       | 1.04 [0.91, 1.18]           | 335                        | 1.03 [0.92, 1.15]        | 174                        | 1.01 [0.56, 1.66]        |
| Homicide and legal intervention       | 27                        | <b>0.56 [0.37, 0.82]</b>    | 36                         | 0.77 [0.54, 1.06]        | 15                         | 1.01 [0.56, 1.66]        |
| All other causes                      | 448                       | <b>2.08 [1.90, 2.29]</b>    | 770                        | <b>1.59 [1.48, 1.71]</b> | 686                        | <b>1.40 [1.30, 1.51]</b> |

<sup>1</sup> Includes primary cancer and subsequent malignancy. AYA = adolescent and young adult. SMR = standardized mortality ratio; Obs = observed number of deaths. 95%CI = 95% confidence interval.

**Figure S1.** Cause-specific mortality by cause of death and time period conditioned on 5-year survival, all AYA cancers diagnosed 1975–2012, SEER-9

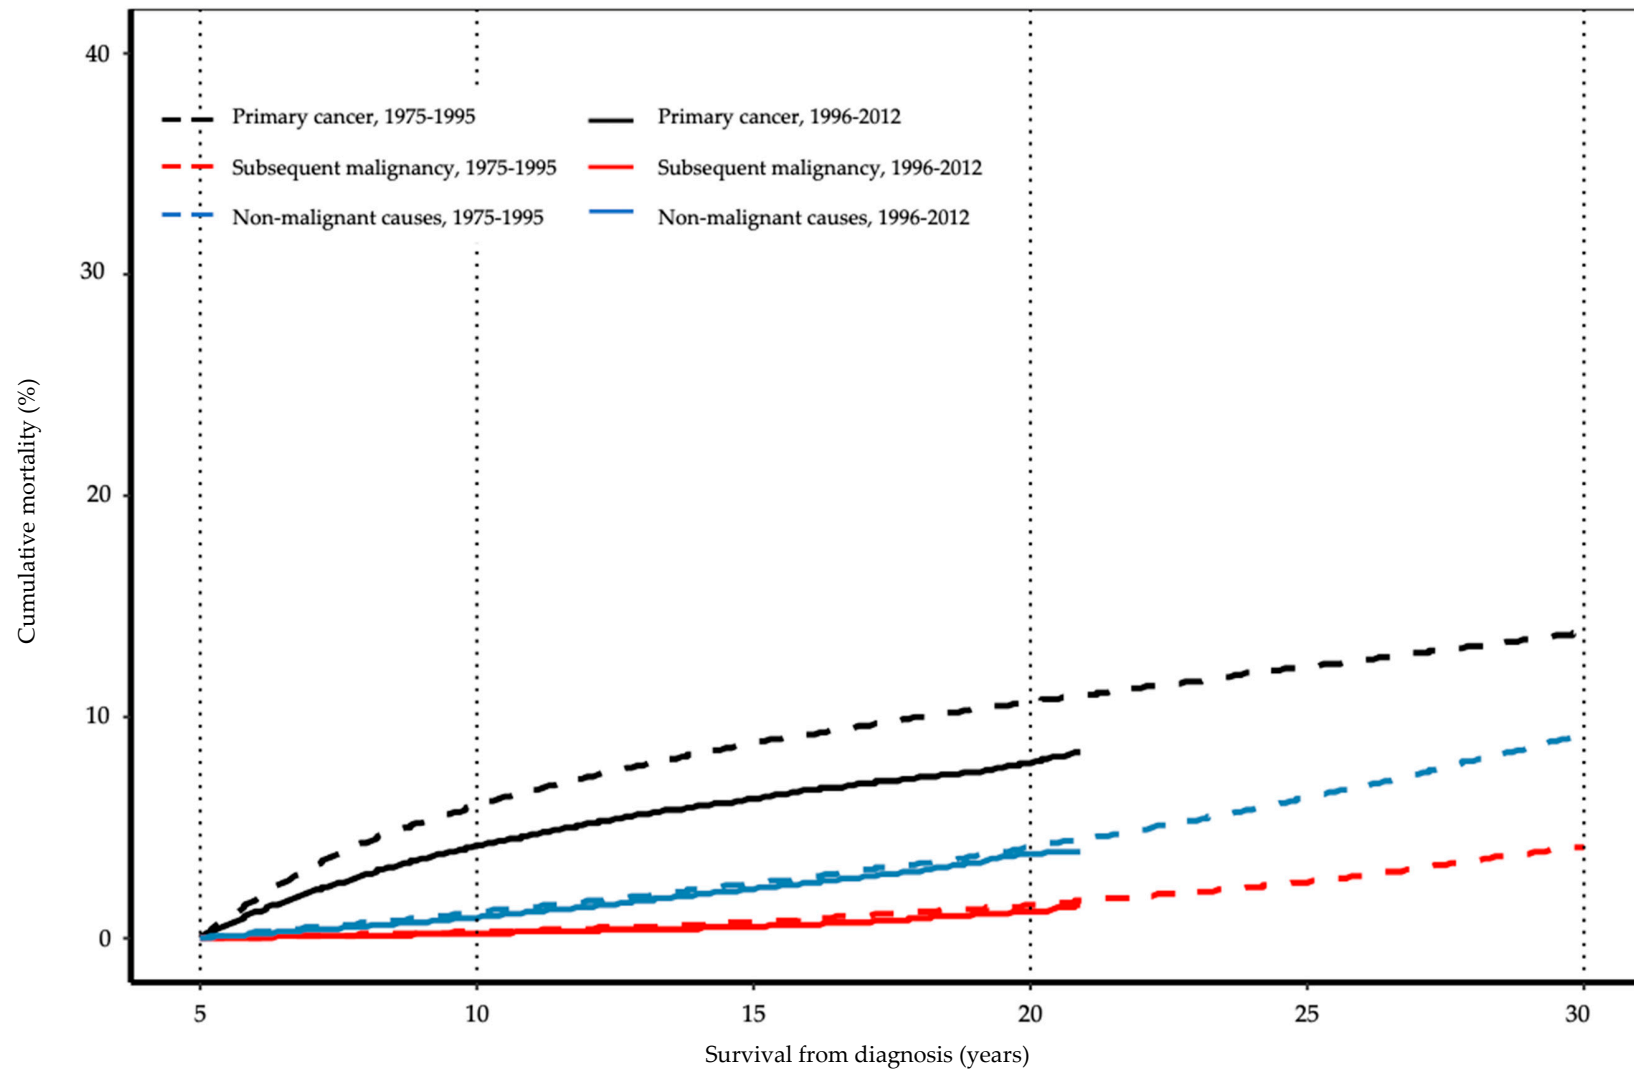

No. at risk

|           |        |        |        |        |        |        |
|-----------|--------|--------|--------|--------|--------|--------|
| 1975–1995 | 79,771 | 73,311 | 69,054 | 64,599 | 46,488 | 27,842 |
| 1996–2012 | 81,436 | 50,702 | 25,278 | 4013   | -      | -      |
